# Supplementary material
Source: publisher figshare collection journal article supplement (https://karger.figshare.com/articles/dataset/_/4602085)
Supplement: Supplementary file 1 [file 2]

Archive with 4 entries (4 files):
- PHA_201610003_1_5_Supplementary_Fig._S4.pdf
- Supplementary Fig. S2.docx
- Supplementary Fig. S1.docx
- Supplementary Fig. S3.docx
