# Supplementary material
Source: publisher figshare collection journal article supplement (https://karger.figshare.com/articles/dataset/_/4602085)
Supplement: Supplementary file 1 [file 2 › PHA_201610003_1_5_Supplementary_Fig._S4.pdf]

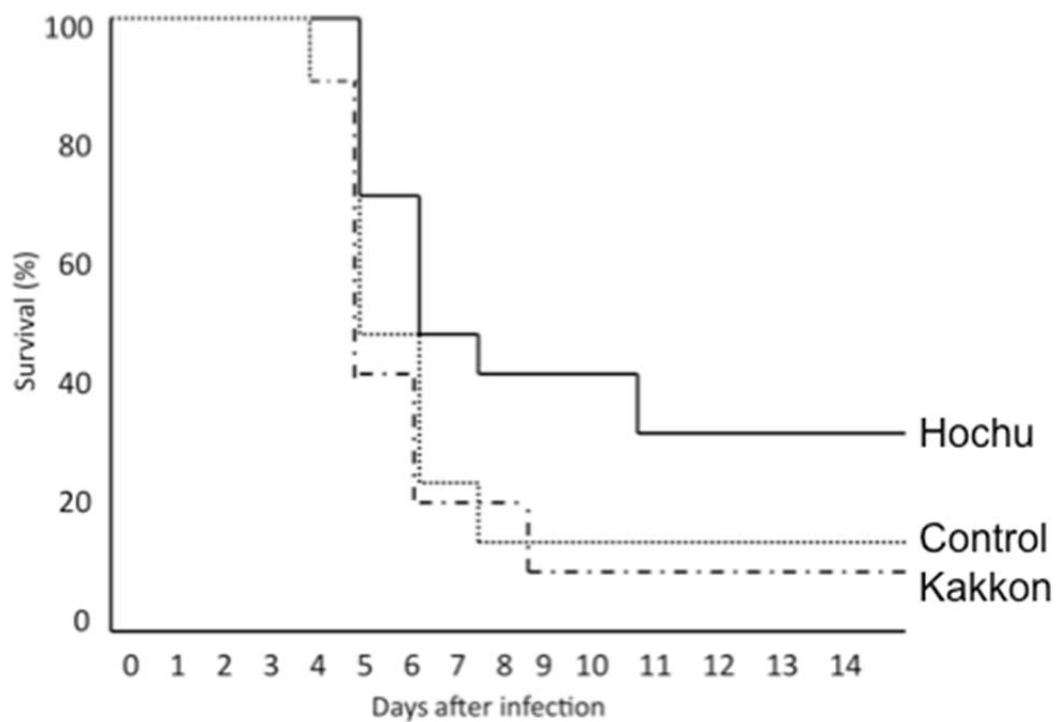

**Supplementary Fig. S4. Comparative effect of Hochuekkito and Kakkonto on survival of influenza virus-infected mice**

These Kampo medicines were both administered at a dose of 1 g/kg orally once daily for 2 weeks before infection.

Control: Virus-infected mice, Hochu: Hochuekkito-pretreated mice, Kakkon: Kakkonto-pretreated mice.
