# Supplementary material
Source: publisher figshare collection journal article supplement (https://karger.figshare.com/articles/dataset/_/4602085)
Supplement: Supplementary file 1 [file 2 › Supplementary Fig. S1.docx]

**
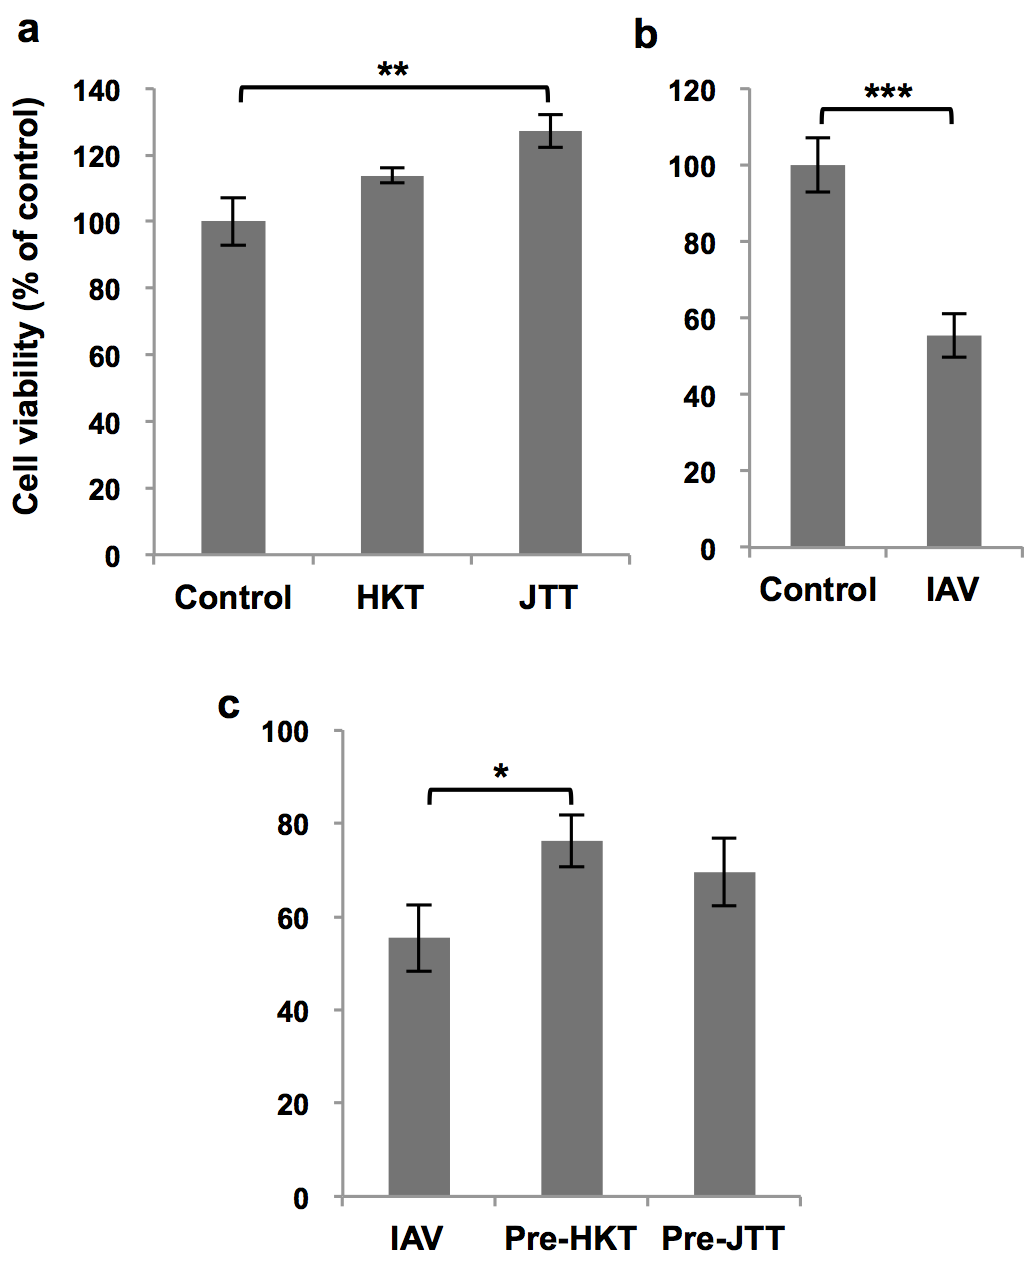
**

**Supplementary Fig. S1. The effects of Kampo medicines against influenza A virus (IAV)-infected MDCK cells at 48 h post-infection.**

MDCK cells were incubated for 48 h after IAV-infection, and cell viability was assessed by LDH release assay. Control indicates uninfected and untreated cells; HKT and JTT indicate Hochuekkito - and Juzen-taiho-to -treated cells without IAV-infection, respectively; IAV indicates cells infected with only IAV; and Pre indicates cells that were treated with Kampo medicines before infection. Data are presented as means ± SEM (n = 6; **p* < 0.05 *vs*. IAV; ***p* < 0.01 *vs*. IAV; ****p* < 0.001). Each graph presents a comparison of viability between control and Kampo-treated (a), between control and IAV (b), between IAV and pre-HKT or pre-JTT cells (c).
