# Supplementary material
Source: publisher figshare collection journal article supplement (https://karger.figshare.com/articles/dataset/_/4602085)
Supplement: Supplementary file 1 [file 2 › Supplementary Fig. S2.docx]

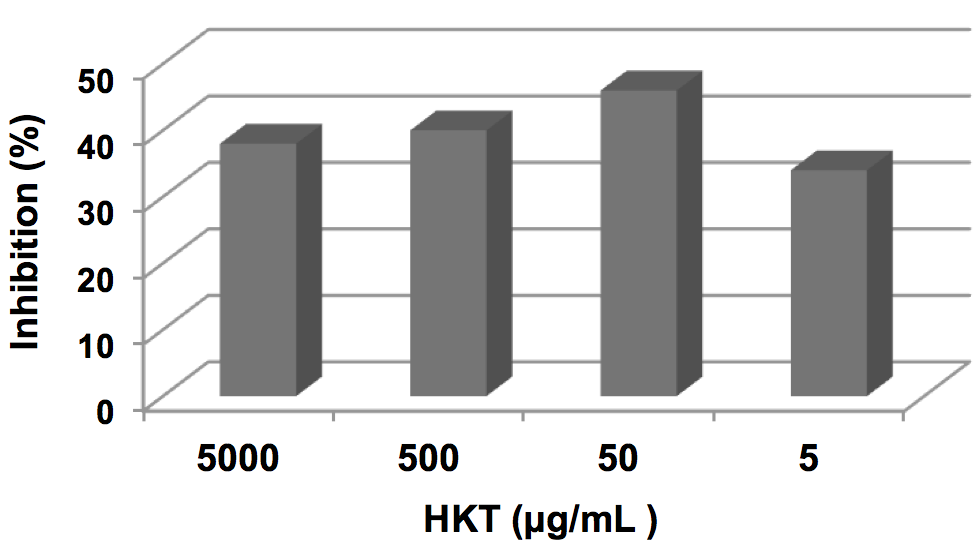


**Supplementary Fig. S2. Dose dependency with Hochuekkito (HKT) against influenza A virus (IAV) by plaque inhibition assay.**

MDCK cells were treated with several diluted concentrations of HKT (5 to 5000 μg/mL) before IAV infection. Data are expressed as plaque inhibition % of IAV-infected control non-treated with HKT.
