# Supplementary material
Source: publisher figshare collection journal article supplement (https://karger.figshare.com/articles/dataset/_/4602085)
Supplement: Supplementary file 1 [file 2 › Supplementary Fig. S3.docx]

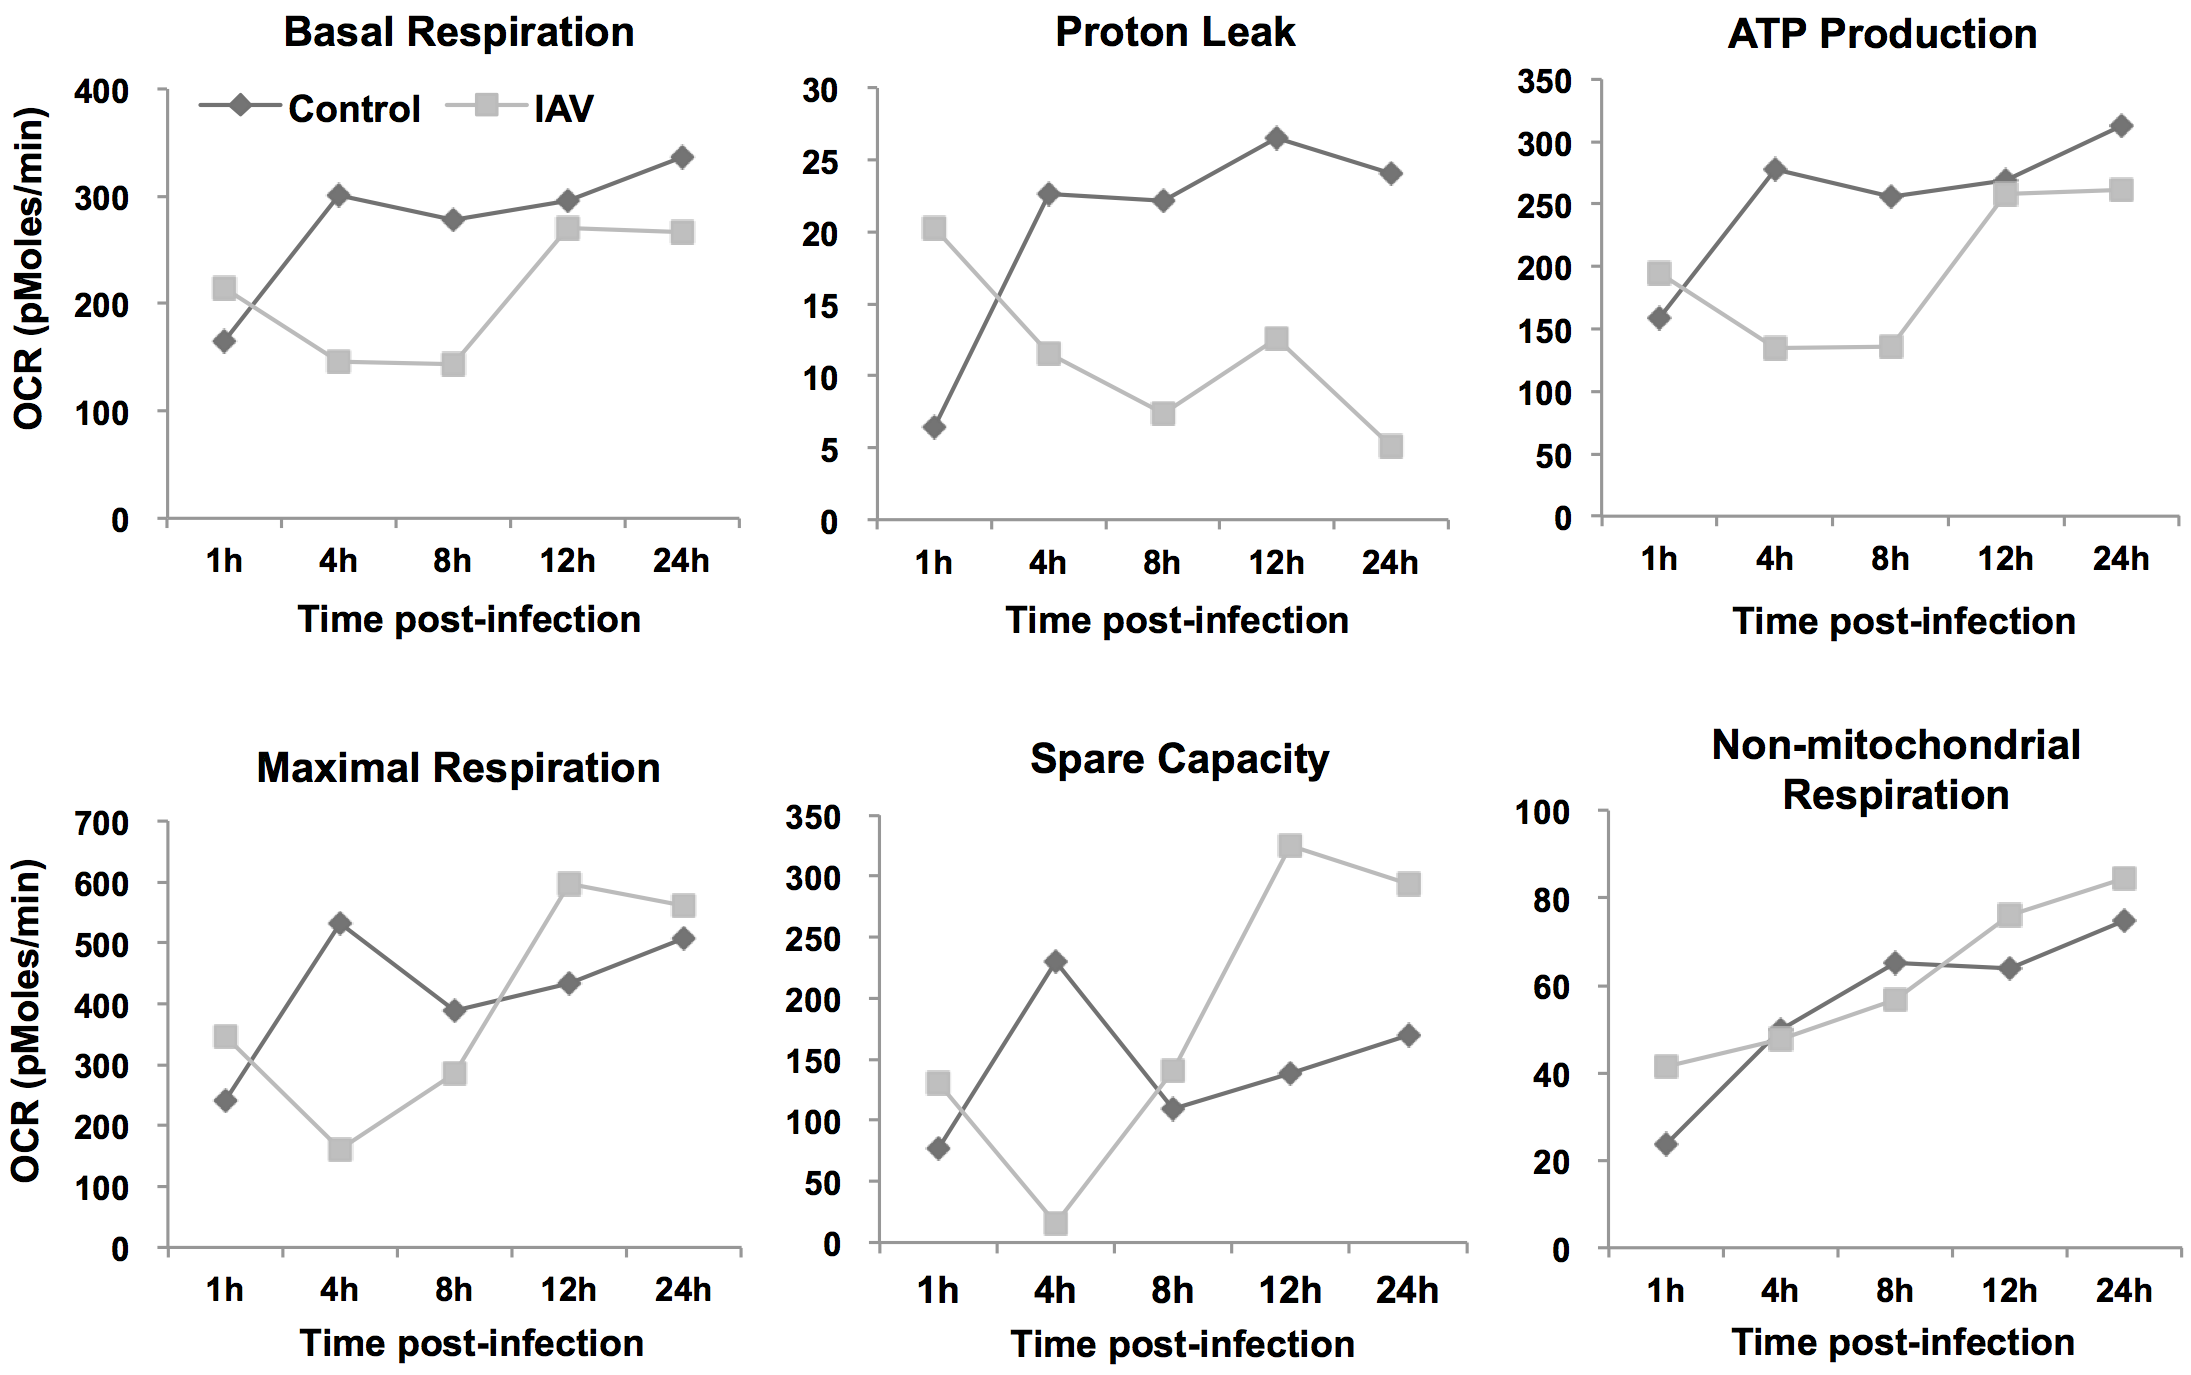
**Supplementary Fig. S3. A screening of oxygen consumption rate (OCR) at each time-point after influenza A virus (IAV) infection by mitochondria stress test.**

MDCK cells were cultured after IAV-infection and OCR at each time-point was measured by the XF24 Extracellular Analyzer. Control indicates uninfected cells, and IAV indicates IAV-infected cells.
